# Supplementary material for: Highly stable organic solar cells with robust interface using fullerenol as molecular linker
Source: Royal Society of Chemistry journal article supplement (doi:10.1039/d4ta07254e), 2024-12-12
Supplement: d4ta07254e1.pdf [file d4ta07254e1.pdf]

## Electronic Supporting Information

### Highly Stable Organic Solar Cells with Robust Interface Using Fullerenol as Molecular Linker

Guan-Lin Chen,<sup>abc</sup> Shih-Hao Wang,<sup>abc</sup> Kai-Wei Tseng,<sup>abc</sup> Ching-I Huang<sup>\*b</sup> and Leeyih Wang<sup>\*abc</sup>

<sup>a</sup> Center for Condensed Matter Sciences, National Taiwan University, Taipei, 10617, Taiwan

<sup>b</sup> Institute of Polymer Science and Engineering, National Taiwan University, Taipei, 10617, Taiwan

<sup>c</sup> Center of Atomic Initiative for New Materials, National Taiwan University, Taipei 10617, Taiwan

\* Corresponding authors' email addresses: [chingih@ntu.edu.tw](mailto:chingih@ntu.edu.tw), [leewang@ntu.edu.tw](mailto:leewang@ntu.edu.tw)

KEYWORDS. Organic solar cells, fullerenol, molecular linker, thermal stability, photo stability

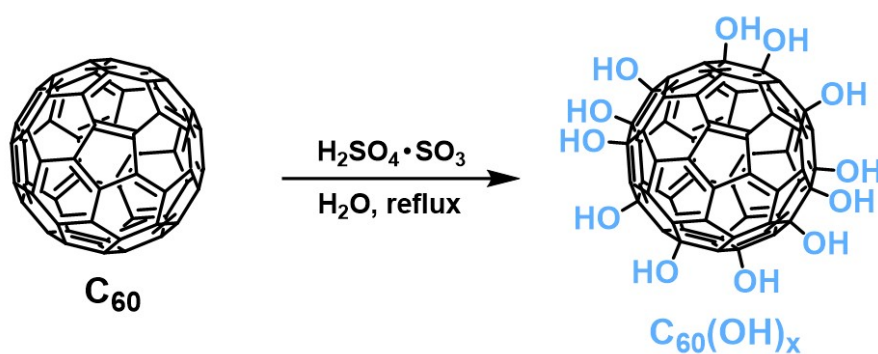

**Scheme S1.** Synthesis of  $\text{C}_{60}(\text{OH})_x$ .<sup>1-3</sup>

An Erlenmeyer flask (250 mL) was charged with  $\text{C}_{60}$  (500 mg, 0.69 mmol), followed by dropwise addition of neat fuming sulfuric acid (100 mL) into the flask. The resulting mixture was stirred at room temperature under a nitrogen atmosphere for seven days to obtain a dark brown solution. The mixture was then slowly added into anhydrous diethyl ether in an ice bath to precipitate the solid compound. The resulting intermediate was then combined with distilled water (100 mL) in a round-bottom flask (250 mL) equipped with a condenser and refluxed overnight. The crude product was separated using a Brinell funnel, washed several times with water, and then dried in a vacuum oven at 90 °C to yield 411 mg of product (~65% yield). The above synthesis method was conducted following previously reported literature procedures<sup>[1-3]</sup>. As mentioned in the literature<sup>[1-3]</sup>, the  $\text{C}_{60}(\text{OH})_x$  obtained from this method contains an average of 10 to 12 hydroxyl groups on each  $\text{C}_{60}$  core.  $^1\text{H NMR}$  (600 MHz,  $\text{DMSO-}d_6$ ):  $\delta$  3.527 (OH).

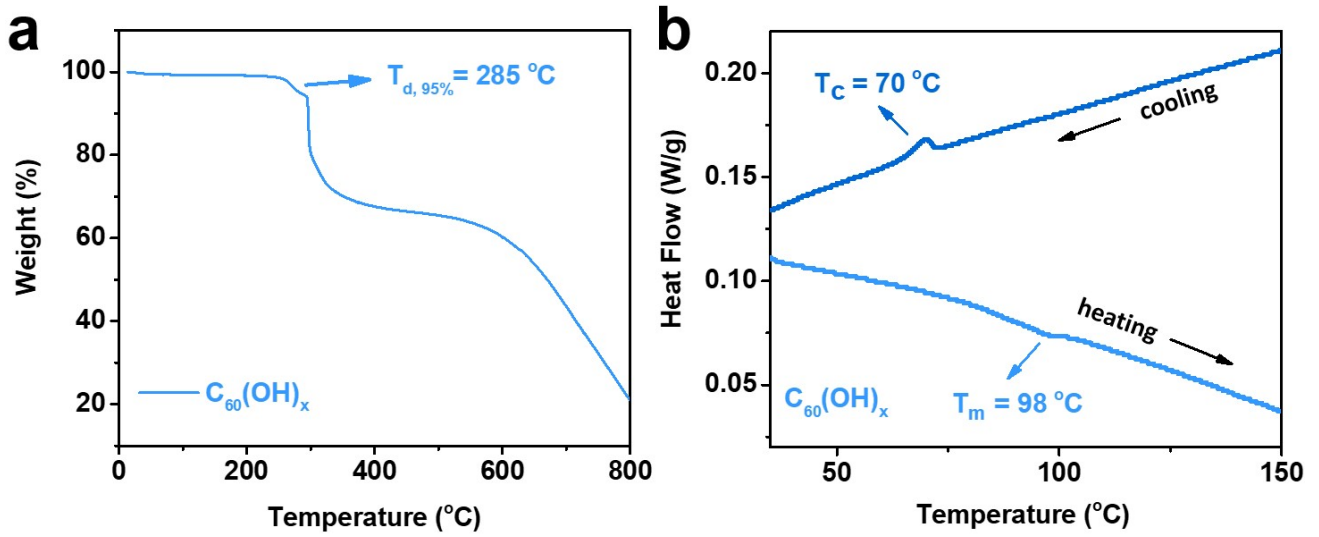

Fig. S1 (a) TGA curve and (b) DSC thermograms of  $\text{C}_{60}(\text{OH})_x$ .

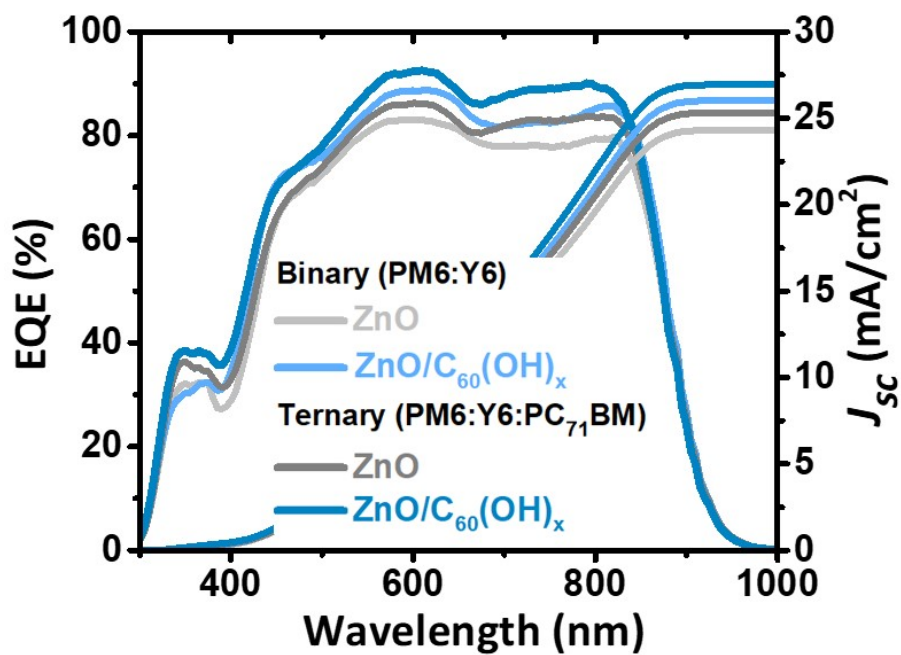

Fig. S2 EQEs spectra and integrated  $J_{sc}$  of all devices in this study.

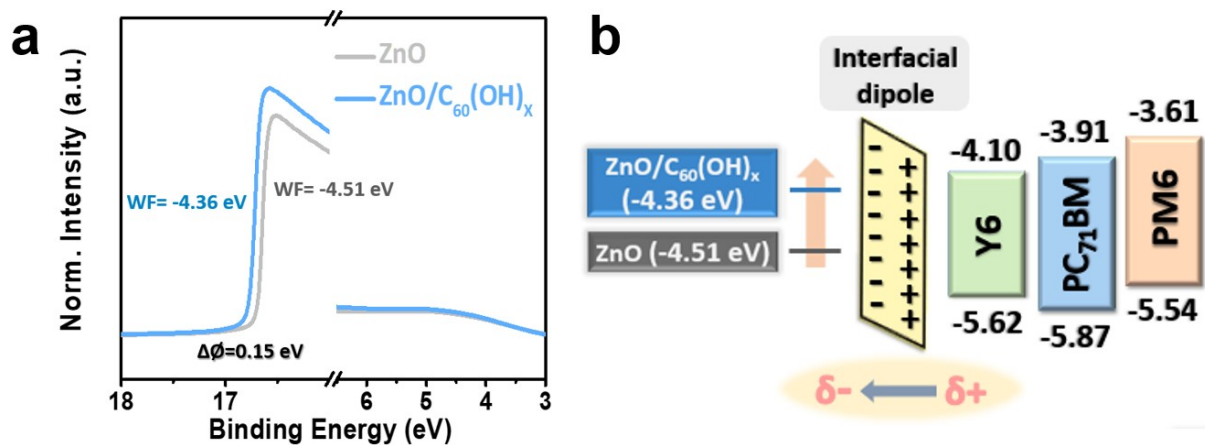

**Fig. S3** (a) Characteristics of the ZnO and ZnO/C<sub>60</sub>(OH)<sub>x</sub> films measured by UPS. (b) Schematic illustration of the energy-level diagram in this study.

**Table S1** The parameters  $\tau_1$  and  $\tau_2$  of biexponential decay fitting for the TRPL results

| ETLs                                  | $\tau_1$<br>Lifetime (ns) | $\tau_2$<br>Lifetime (ns) |
|---------------------------------------|---------------------------|---------------------------|
| ZnO                                   | 1.46                      | 2.00                      |
| ZnO/C <sub>60</sub> (OH) <sub>x</sub> | 1.09                      | 1.44                      |

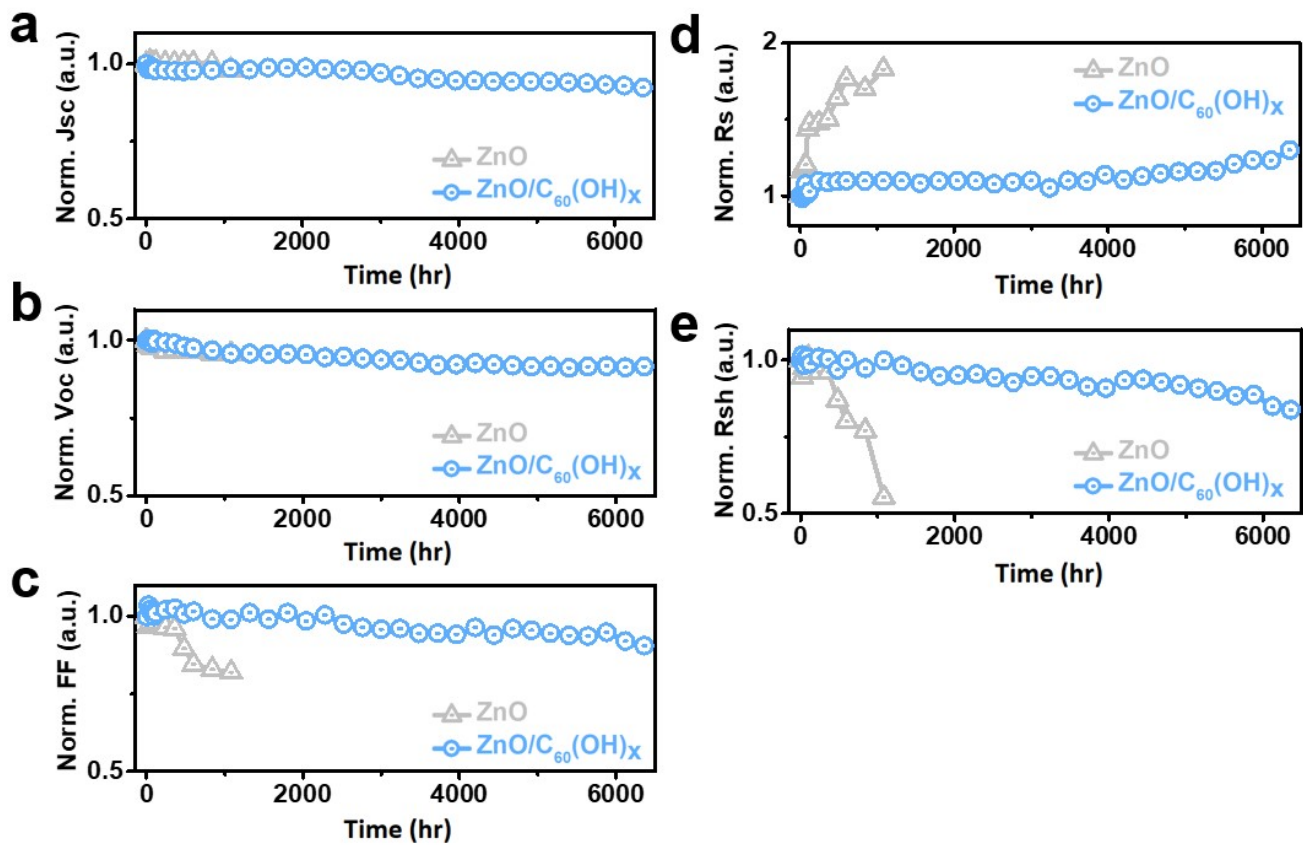

**Fig. S4** The evolutions of normalized (a)  $J_{sc}$ , (b)  $V_{oc}$ , (c) FF, (d)  $R_s$ , and (e)  $R_{sh}$  of the studied OSCs under thermal aging at 65 °C in N<sub>2</sub>.

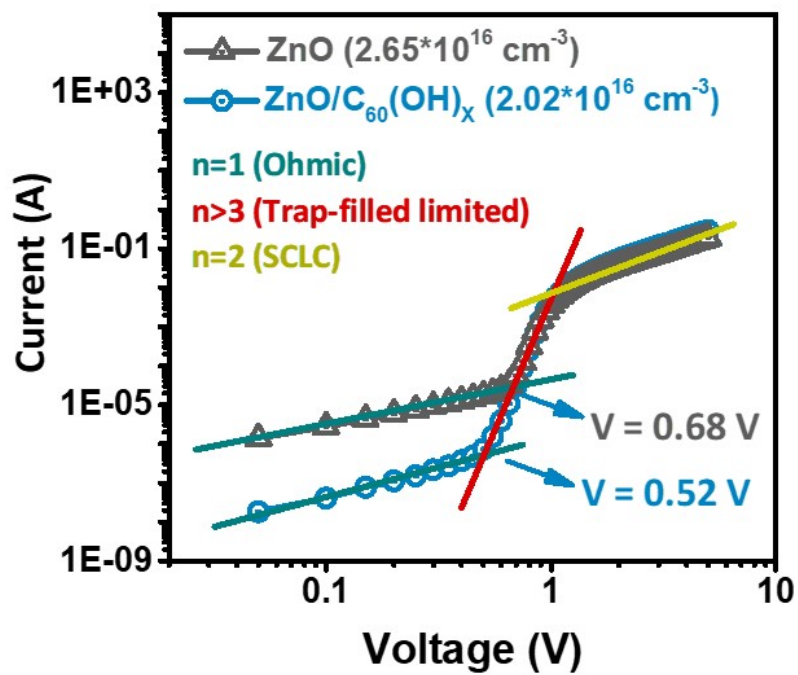

Fig. S5 Current-voltage traces and trap density of ZnO and ZnO/ $\text{C}_{60}(\text{OH})_x$  devices. <sup>[4]</sup> These devices were thermally annealed at 65 °C for 800 hr in  $\text{N}_2$  prior measurement.

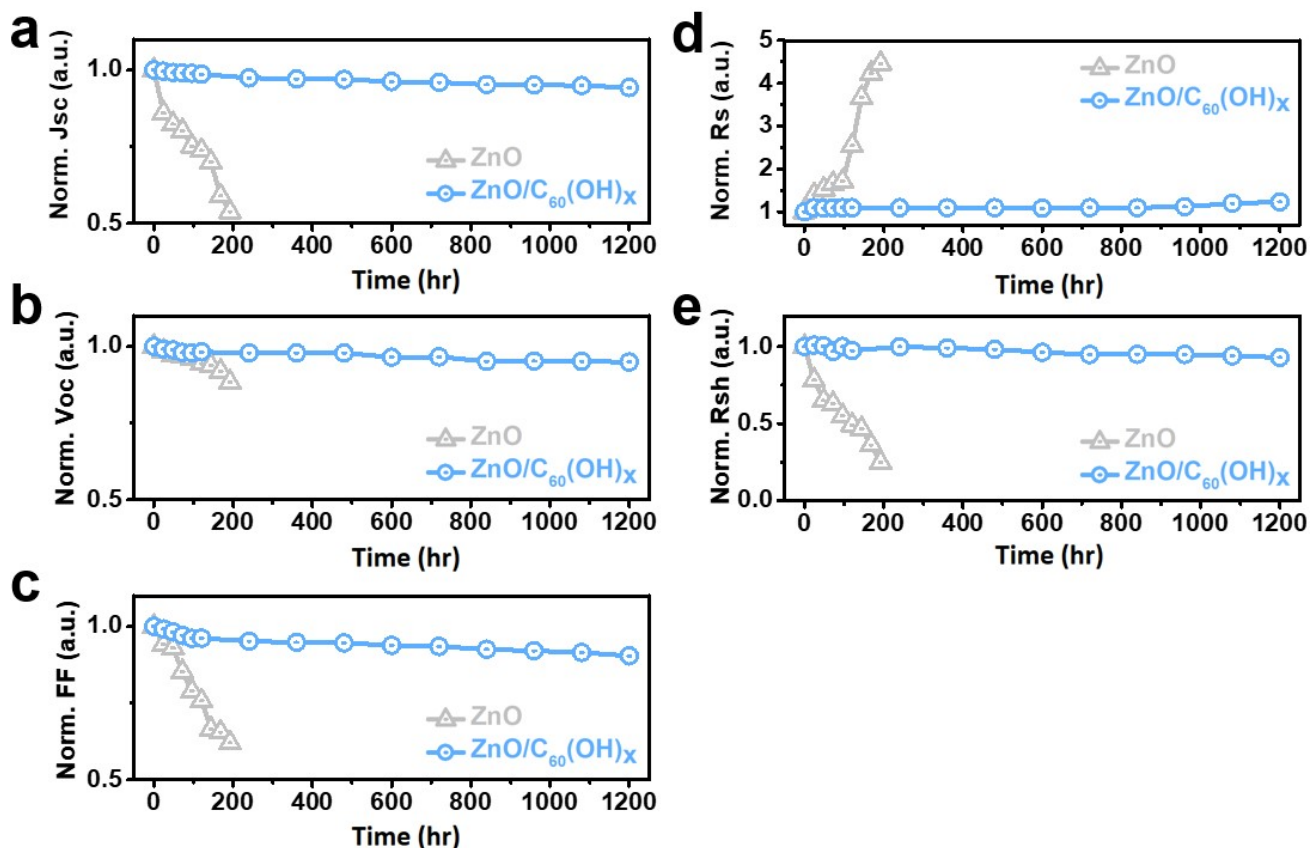

**Fig. S6** The evolutions of normalized (a)  $J_{sc}$ , (b)  $V_{oc}$ , (c) FF, (d)  $R_s$ , and (e)  $R_{sh}$  of the studied OSCs during continuous light soaking under AM 1.5G simulated solar light at one-sun intensity in N<sub>2</sub>.

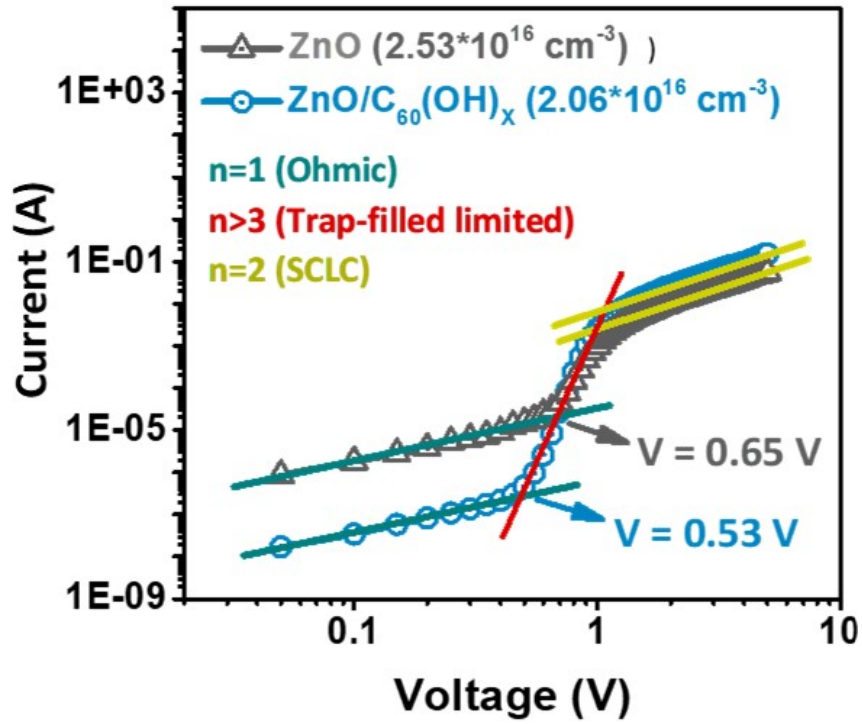

**Fig S7** Current-voltage traces and trap density of ZnO and ZnO/ $\text{C}_{60}(\text{OH})_x$  devices. <sup>[4]</sup> These devices were continuously illuminated with AM 1.5G simulated solar light at one-sun intensity for 120 hr in  $\text{N}_2$  before measurement.



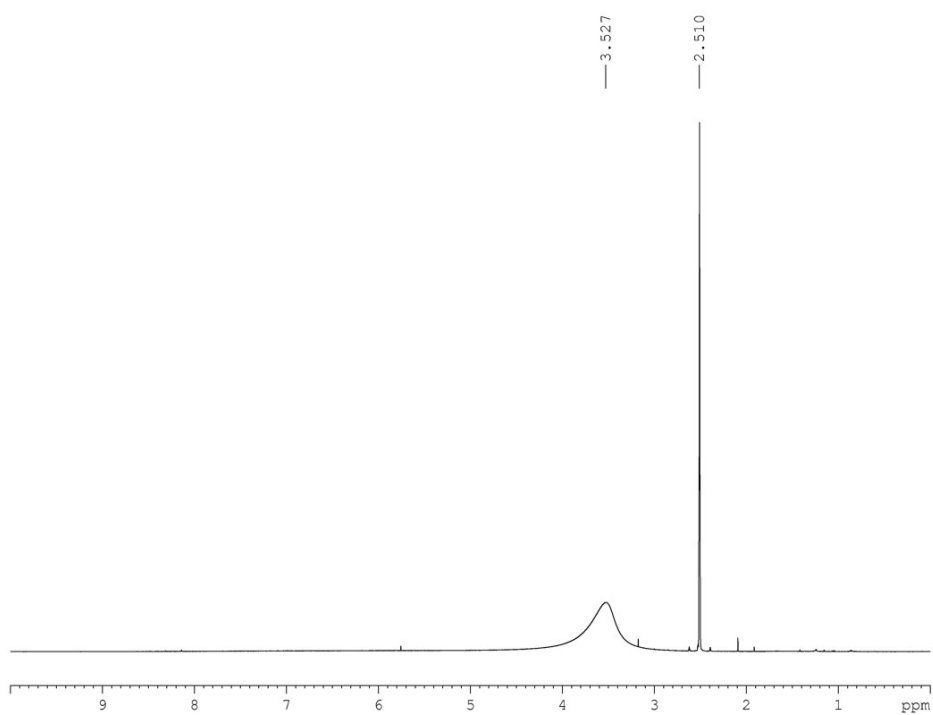

**Fig S8** <sup>1</sup>H-NMR spectrum of C<sub>60</sub>(OH)<sub>x</sub>.

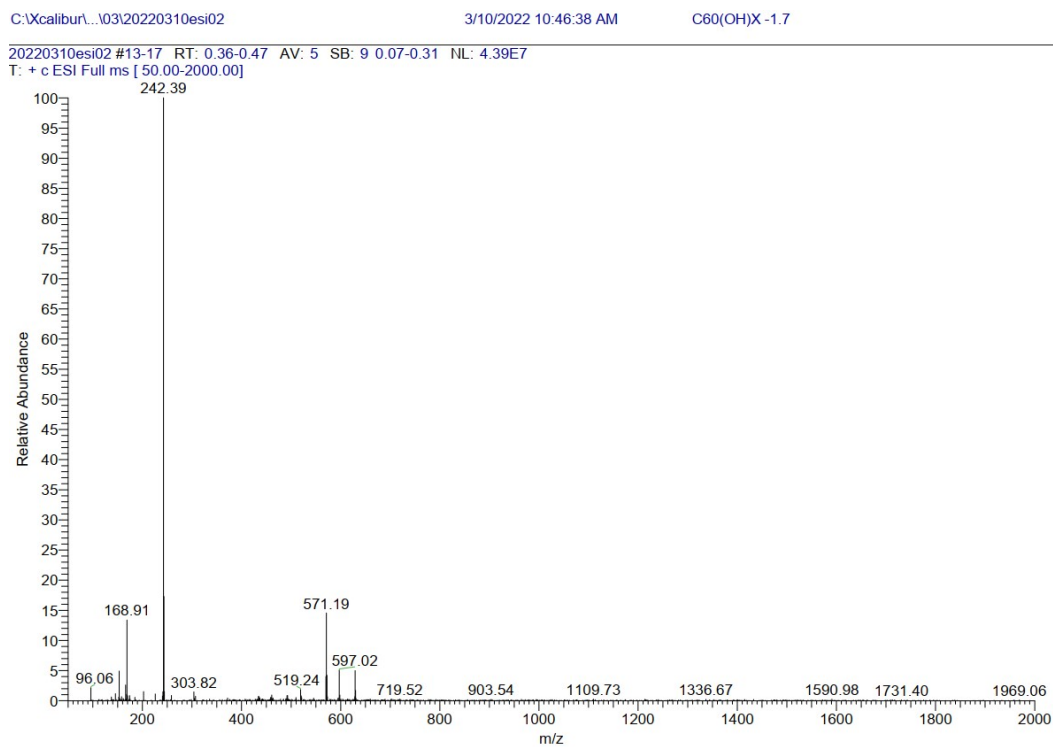

**Fig S9** Mass spectrum of C<sub>60</sub>(OH)<sub>x</sub>.

## EXPERIMENTAL SECTION

**Materials.** PM6 and Y6 were obtained from WAYS Technical Corp., Ltd. (Taiwan) and were used without additional purification. Molybdenum trioxide ( $\text{MoO}_3$ ), chloroform (CF), *N,N*-dimethylformamide (DMF), 1-chloronaphthalene (CN), chlorobenzene (CB), deuterated dimethyl sulfoxide ( $\text{DMSO-}d_6$ ), 2-methoxyethanol, and ethanolamine were purchased from Sigma-Aldrich.  $\text{C}_{60}$  and  $\text{PC}_{71}\text{BM}$  were purchased from 1-Materials (Canada).

**Device Fabrication.** Inverted OSCs were constructed with the configuration ITO glass/ $\text{ZnO}$  or  $\text{ZnO}/\text{C}_{60}(\text{OH})_x/\text{photoactive layer}/\text{MoO}_3/\text{Ag}$ . The ITO-coated glass substrates underwent ultrasonic cleaning in detergent, deionized water, acetone, and isopropanol, each for 30 minutes. Following this, the substrates were dried using  $\text{N}_2$  flow and subjected to plasma treatment for 10 minutes. For the  $\text{ZnO}$  layer, a precursor solution was made by dissolving 100 mg of zinc acetate in 1.0 mL of 2-methoxyethanol, with 28  $\mu\text{L}$  of ethanolamine added. This  $\text{ZnO}$  precursor was spin-coated onto the ITO substrates at 4000 rpm for 30 seconds and then annealed at  $220^\circ\text{C}$  for 30 minutes in ambient air. The  $\text{C}_{60}(\text{OH})_x$  solution, with a concentration of 0.1 mg/mL, was prepared using DMF as the solvent. This solution was spin-coated onto the  $\text{ZnO}$  layer at 4000 rpm for 1 minute and then annealed at  $140^\circ\text{C}$  for 10 minutes in ambient air. The thickness of the  $\text{C}_{60}(\text{OH})_x$  was estimated using a Surface Profiler ( $\alpha$ -stepper) to be around 1 to 2 nm. For the photoactive layer, the precursor solution for the PM6:Y6 bulk heterojunction (BHJ) blend, in a 1:1.2 weight ratio, was prepared in CF with 0.5% volume ratio of CN. This solution was spin-coated onto the  $\text{ZnO}$  or  $\text{ZnO}/\text{C}_{60}(\text{OH})_x$  electron transport layers (ETLs) at 3000

rpm for 40 seconds and annealed at 110°C for 10 minutes in N<sub>2</sub>. Similarly, the precursor solution for the PM6:Y6:PC<sub>71</sub>BM BHJ blend, in a 1:1.2:0.2 weight ratio, was prepared in CF with a 0.75% volume ratio of CN. This solution was spin-coated onto the ZnO or ZnO/C<sub>60</sub>(OH)<sub>x</sub> ETLs at 3000 rpm for 40 seconds and annealed at 90°C for 10 minutes in N<sub>2</sub>. Finally, 8 nm of MoO<sub>3</sub> and 100 nm of Ag were sequentially thermally deposited under high vacuum (<10<sup>-6</sup> Torr) to form the top electrode. The active area of each device was 0.07 cm<sup>2</sup>.

and reverse scan between -□.□ and □.□ V with a voltage step of □.□□ V and delay time of □□ ms by a Keithley □□□□ source meter (Keithley Instrument, Inc.). The photovoltaic performance measurements were conducted under one-sun intensity (□□□ mW cm<sup>-2</sup>) using a Xenon-lamp based solar simulator calibrated with AM□.□G spectrum (Enli Tech.). The intensity of the solar spectrum was calibrated by a SRC□□□□ monocrystalline sili-

con solar cell (Enli Tech.). The SEM measurement were performed using a S- $\square\square\square\square$  SEM instrument (Hitachi, Japan) at  $\square$  kV. The XRD data of the

**Characterization:** The J–V characteristics were performed with forward and reverse scan between  $-\square.\square$  and  $\square.\square$  V with a voltage step of  $\square.\square\square$  V and delay time of  $\square\square$  ms by a Keithley  $\square\square\square\square$  source meter (Keithley Instrument, Inc.). The photovoltaic performance measurements were conducted under one-sun intensity ( $\square\square\square$  mW cm<sup>-2</sup>) using a Xenon-lamp based solar simulator calibrated with AM $\square.\square$ G spectrum (Enli Tech.). The intensity of the solar spectrum was calibrated by a SRC $\square\square\square\square$  monocrystalline sili-

con solar cell (Enli Tech.). The SEM measurement were performed using a S-4300 SEM instrument (Hitachi, Japan) at 15 kV. The XRD data of the

**Characterization:** The J–V characteristics were performed with forward and reverse scan between  $-0.5$  and  $0.5$  V with a voltage step of  $0.01$  V and delay time of  $10$  ms by a Keithley 642 source meter (Keithley Instrument, Inc.). The photovoltaic performance measurements were conducted under one-sun intensity ( $100$  mW  $\text{cm}^{-2}$ ) using a Xenon-lamp based solar simulator calibrated with AM1.5G spectrum (Enli Tech.). The intensity of the solar spectrum was calibrated by a SRC4000 monocrystalline sili-

con solar cell (Enli Tech.). The SEM measurement were performed using a S-4300 SEM instrument (Hitachi, Japan) at 15 kV. The XRD data of the

**Characterization:** The J–V characteristics were performed with forward and reverse scan between  $-0.5$  and  $0.5$  V with a voltage step of  $0.01$  V and delay time of  $10$  ms by a Keithley 642 source meter (Keithley Instrument, Inc.). The photovoltaic performance measurements were conducted under one-sun intensity ( $100$  mW  $\text{cm}^{-2}$ ) using a Xenon-lamp based solar simulator calibrated with AM $1.5$ G spectrum (Enli Tech.). The intensity of the solar spectrum was calibrated by a SRC4000 monocrystalline sili-

con solar cell (Enli Tech.). The SEM measurement were performed using a S-□□□□ SEM instrument (Hitachi, Japan) at □ kV. The XRD data of the

**Characterization.** IR spectra were recorded with a JASCO 4100 FT-IR spectrometer, and UV-vis absorption spectra were measured using a JASCO V-670 spectrometer (JASCO Company, Hachioji, Tokyo, Japan). Photoluminescence (PL) spectra were obtained with an Edinburgh PLS 920. For time-resolved PL decay curves, a time-correlated single photon counting (TCSPC) method was utilized. The sample was illuminated with a 485 nm laser head (LDH-P-C-485) from PicoQuant GmbH, driven by a picosecond pulsed diode laser driver (PDL 800-B) from the same company, operating at 2.5 MHz with a 400 ns pulse duration and a fluence of approximately  $25.4 \mu\text{W cm}^{-2}$ . The PL signal was detected using an ultralow noise single photon avalanche detector (ID-100-50) from Becker & Hickl GmbH. External quantum efficiency (EQE) measurements were carried out with monochromatic light from a xenon lamp (QE-R, Enlitech Co., Ltd.), and light intensity at each wavelength was calibrated using a standard single crystal Si photovoltaic cell from 300 to 800 nm. Electrochemical impedance spectroscopy (EIS) was performed with a Metrohm Autolab PGSTAT 320N, applying a small AC perturbation voltage of 15 mV to the devices and measuring the output currents across a frequency range of 1 MHz to 1 Hz. X-ray photoelectron spectroscopy (XPS) was conducted with a Theta Probe Angle-Resolved X-ray Photoelectron Spectrometer using Al-K $\alpha$  X-ray

photons ( $h\nu = 1486.6$  eV). Current-voltage ( $J$ - $V$ ) characteristics were measured using a Keithley 2400 source meter (Keithley Instruments, Inc.) with a voltage scan from -0.05 to 1 V, a step of 0.01 V, and a delay time of 10 ms. Photovoltaic performance was assessed under one-sun intensity ( $100$  mW  $\text{cm}^{-2}$ ) with a Xenon-lamp based solar simulator calibrated to the AM1.5G spectrum (Enlitech). The solar spectrum intensity was calibrated using the SRC 2020 monocrystalline silicon solar cell (Enlitech). The mass analysis was performed using Orbitrap QE Plus Mass Spectrometry.  $^1\text{H}$  NMR were recorded on a Bruker Avance III HD-600 MHz using  $\text{DMSO-}d_7$  as the solvent. The thermal properties of the samples were characterized using a PerkinElmer DSC 8000 instrument under a nitrogen atmosphere, with a heating/cooling cycle ranging from 25 to 150  $^{\circ}\text{C}$  at a rate of 10  $^{\circ}\text{C}/\text{min}$ . Thermogravimetric analysis (TGA) was conducted using a HITACHI STA 7200 thermogravimetric analyzer, with samples heated from 25 to 800  $^{\circ}\text{C}$  at a rate of 10  $^{\circ}\text{C}/\text{min}$  in a nitrogen environment. Ultraviolet photoelectron spectroscopy (UPS) measurements were conducted using an ULVAC-PHI PHI 5000 Versaprobe II electron spectroscopy for chemical analysis system, with a He (I) (21.22 eV) light source.

**Stability testing.** The thermal stability of the devices was examined by subjecting them to constant heat stress in  $\text{N}_2$  within a glovebox. For the light-soaking test, the devices were exposed to AM 1.5G simulated solar light (LSH-7320, Newport, Bozeman, USA) at one-sun intensity in  $\text{N}_2$ .

## References

- 1 L. Y. Chiang, J. B. Bronsle, L. Wang, S. F. Shu, T. M. Chang and J. R. Hwu, *Tetrahedron*, 1996, **52**, 4963.



- 2 Z. Li, S.-H. Wang, J. Cui, Y. Wang, J. Zhang, P. Xu, M. Zhou, L. Wang and H.-L. Wang, *ACS Nano*, 2020, **14**, 1600–1608.
- 3 L. Y. Chiang, L. Y. Wang, J. W. Swirczewski, S. Soled and S. Cameron, *J. Org. Chem.*, 1994, **59**, 3960–3968.
- 4 L. Ma, S. Zhang, H. Yao, Y. Xu, J. Wang, Y. Zu and J. Hou, *ACS Appl. Mater. Interfaces*, 2020, **12**, 18777.
